# Supplementary material for: Disruptions in Effective Connectivity within and between Default Mode Network and Anterior Forebrain Mesocircuit in Prolonged Disorders of Consciousness
Source: MDPI journal article supplement (doi:10.3390/brainsci11060749), 2021-06-04
Supplement: s1 [file s1]

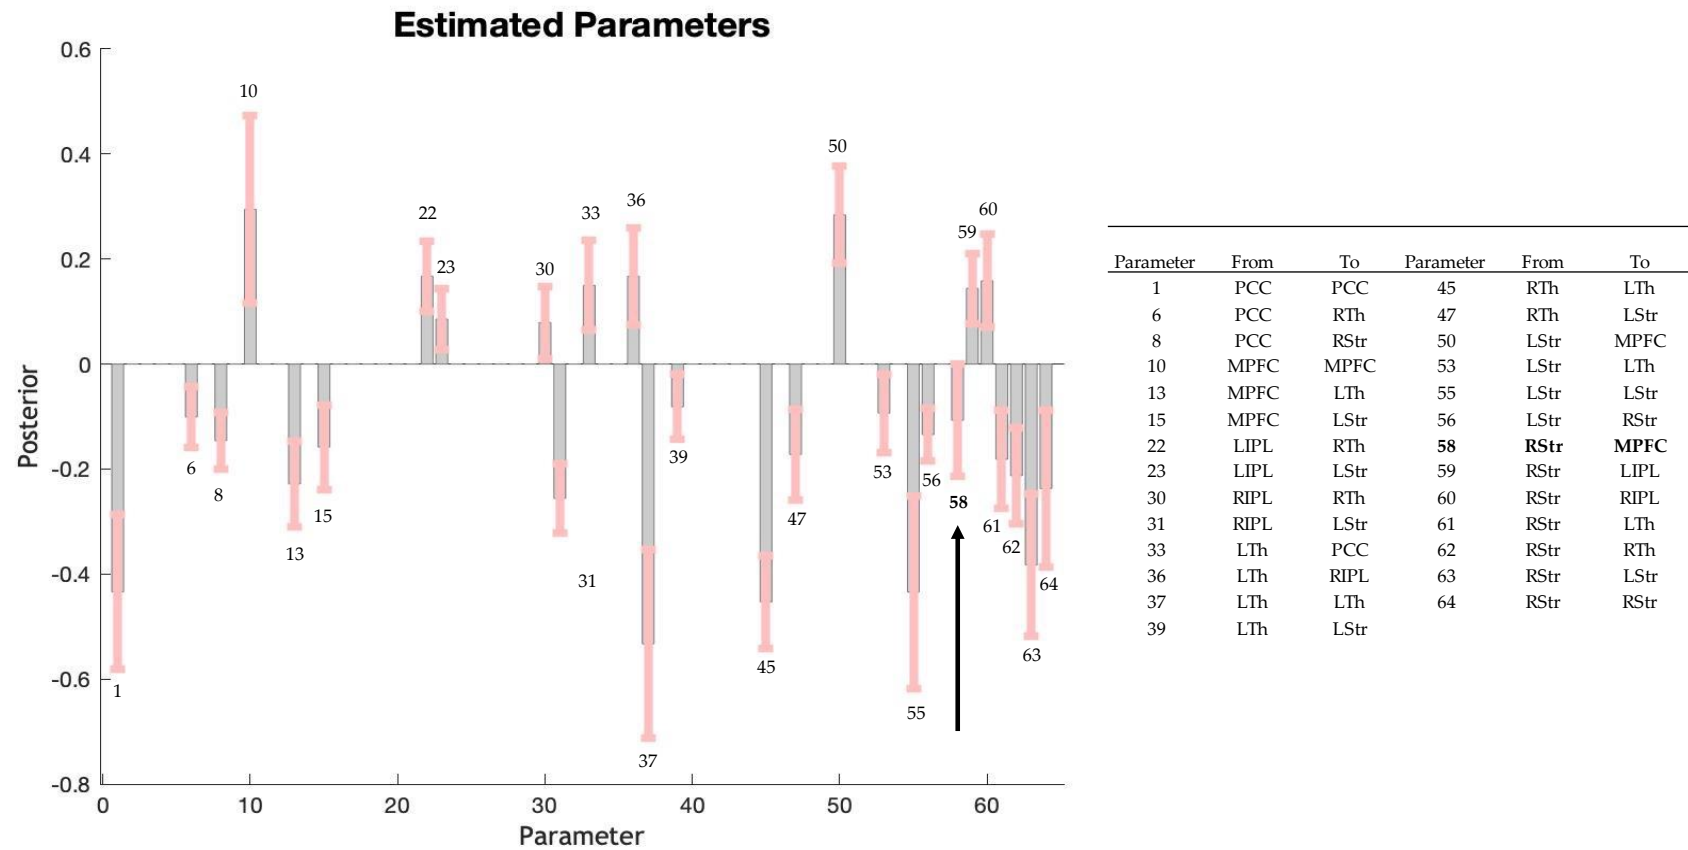

**Figure S1.** Posterior estimates after Bayesian model reduction (grey bars) and 95% Bayesian confidence intervals (pink lines). The parameters along the horizontal axis represent the connection number. The problematic parameter between the right striatum (RStr) and medial prefrontal cortex (MPFC) is indicated with an arrow (parameter 58).

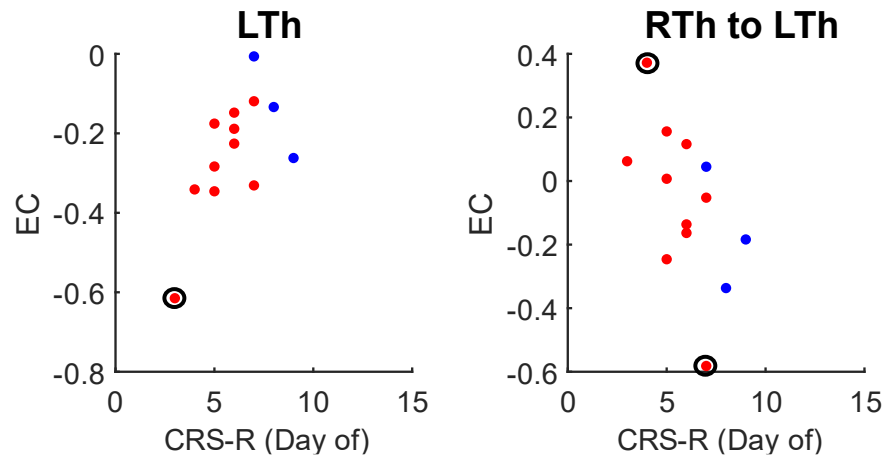

**Figure S2.** Correlations between effective connectivity (y-axis) in the Left thalamus (left) and the connection from right to left thalamus (right) and CRS-R (x-axis) on the day of the scan (N = 13). Note that these correlations are no longer significant when the outliers (circled red dot) are removed from the analysis. Red dots indicate vegetative state patients and blue show minimally conscious state. All connections (including self-connections) are displayed in Hz. EC, effective connectivity; CRS-R, coma recovery scale-revised; LTh, left thalamus; RTh, right thalamus.

**Table S1.** Correlation between CRS-R and effective connectivity in the regions and connections showing differences between PDOC and healthy controls.

|                  |              | CRS-R on day of scan |         |          |              |    | Max CRS-R on week of scan |         |              |              |    |
|------------------|--------------|----------------------|---------|----------|--------------|----|---------------------------|---------|--------------|--------------|----|
|                  |              | Kendall's<br>Tau B   | p-value | JZS-BF10 | JZS-<br>BF01 | N  | Kendall's<br>Tau B        | p-value | JZS-<br>BF10 | JZS-<br>BF01 | N  |
| DMN              | PCC to PCC   | 0.259                | 0.237   | 0.699    | 1.432        | 13 | 0.301                     | 0.118   | 1.088        | 0.92         | 16 |
|                  | PCC to RTh   | -0.014               | 0.95    | 0.35     | 2.86         | 13 | -0.177                    | 0.358   | 0.486        | 2.058        | 16 |
|                  | PCC to RStr  | -0.423               | 0.053   | 2.199    | 0.455        | 13 | -0.319                    | 0.098   | 1.262        | 0.792        | 16 |
|                  | MPFC         | -0.123               | 0.575   | 0.408    | 2.452        | 13 | -0.124                    | 0.52    | 0.391        | 2.558        | 16 |
| DMN<br>to<br>AFM |              | -0.276               | 0.365   | 0.642    | 1.558        | 8  | 0.048                     | 0.853   | 0.4          | 2.503        | 10 |
|                  | MPFC to LTh  | 0.095                | 0.663   | 0.384    | 2.607        | 13 | 0.071                     | 0.713   | 0.34         | 2.945        | 16 |
|                  |              | 0.016                | 0.944   | 0.363    | 2.756        | 12 | 0.02                      | 0.92    | 0.328        | 3.045*       | 15 |
|                  | MPFC to LStr | 0.123                | 0.575   | 0.408    | 2.452        | 13 | 0.177                     | 0.358   | 0.486        | 2.058        | 16 |
|                  |              | 0.048                | 0.834   | 0.37     | 2.704        | 12 | 0.141                     | 0.481   | 0.419        | 2.388        | 15 |
|                  | LIPL to RTh  | 0.041                | 0.852   | 0.355    | 2.816        | 13 | -0.071                    | 0.713   | 0.34         | 2.945        | 16 |
|                  |              | 0.048                | 0.834   | 0.37     | 2.704        | 12 | -0.153                    | 0.447   | 0.439        | 2.28         | 15 |
|                  | LIPL to LStr | 0.068                | 0.755   | 0.366    | 2.731        | 13 | 0.124                     | 0.52    | 0.391        | 2.558        | 16 |
|                  | RIPL to RTh  | 0.014                | 0.95    | 0.35     | 2.86         | 13 | 0                         | 1       | 0.317        | 3.154*       | 16 |
|                  | RIPL to LStr | -0.286               | 0.191   | 0.814    | 1.228        | 13 | -0.106                    | 0.582   | 0.37         | 2.704        | 16 |
|                  | LTh to PCC   | -0.204               | 0.35    | 0.538    | 1.859        | 13 | -0.142                    | 0.462   | 0.417        | 2.399        | 16 |

|     |                   |              |               |              |              |           |        |       |       |        |    |
|-----|-------------------|--------------|---------------|--------------|--------------|-----------|--------|-------|-------|--------|----|
|     |                   |              |               |              |              |           | -0.101 | 0.614 | 0.371 | 2.696  | 15 |
|     | LTh to RIPL       | -0.204       | 0.35          | 0.538        | 1.859        | 13        | -0.053 | 0.783 | 0.329 | 3.035* | 16 |
|     |                   | -0.463       | 0.123         | 1.3          | 0.769        | 8         | -0.327 | 0.176 | 0.909 | 1.1    | 11 |
|     | <b>LTh</b>        | <b>0.477</b> | <b>0.029*</b> | <b>3.63</b>  | <b>0.275</b> | <b>13</b> | 0.266  | 0.168 | 0.828 | 1.207  | 16 |
|     |                   | <b>0.375</b> | <b>0.105</b>  | <b>1.331</b> | <b>0.751</b> | <b>12</b> | 0.183  | 0.362 | 0.497 | 2.012  | 15 |
|     | LTh to LStr       | -0.095       | 0.663         | 0.384        | 2.607        | 13        | -0.018 | 0.927 | 0.318 | 3.14*  | 16 |
|     | <b>RTh to LTh</b> | <b>-0.45</b> | <b>0.04*</b>  | <b>2.804</b> | <b>0.357</b> | <b>13</b> | -0.337 | 0.081 | 1.477 | 0.677  | 16 |
|     |                   | <b>-0.35</b> | <b>0.15</b>   | <b>1.032</b> | <b>0.969</b> | <b>11</b> | -0.258 | 0.218 | 0.72  | 1.388  | 14 |
|     | RTh to LStr       | -0.041       | 0.852         | 0.355        | 2.816        | 13        | 0.018  | 0.927 | 0.318 | 3.14*  | 16 |
|     |                   | 0.048        | 0.834         | 0.37         | 2.704        | 12        | 0.04   | 0.84  | 0.333 | 2.999  | 15 |
|     | LStr to MPFC      | 0.232        | 0.29          | 0.608        | 1.644        | 13        | 0.035  | 0.854 | 0.323 | 3.1*   | 16 |
|     |                   |              |               |              |              |           | -0.02  | 0.92  | 0.328 | 3.045* | 15 |
| AFM |                   |              |               |              |              |           |        |       |       |        |    |
| to  |                   |              |               |              |              |           |        |       |       |        |    |
| DMN | LStr to LTh       | 0.041        | 0.852         | 0.355        | 2.816        | 13        | 0.124  | 0.52  | 0.391 | 2.558  | 16 |
|     |                   | 0.145        | 0.596         | 0.469        | 2.133        | 9         | 0.176  | 0.442 | 0.483 | 2.07   | 12 |
|     | LStr              | 0.068        | 0.755         | 0.366        | 2.731        | 13        | 0.106  | 0.582 | 0.37  | 2.704  | 16 |
|     |                   | -0.016       | 0.944         | 0.363        | 2.756        | 12        | 0.06   | 0.762 | 0.342 | 2.924  | 15 |
|     | LStr to RStr      | -0.014       | 0.95          | 0.35         | 2.86         | 13        | 0.071  | 0.713 | 0.34  | 2.945  | 16 |
|     | RStr to MPFC      | 0.095        | 0.663         | 0.384        | 2.607        | 13        | 0.089  | 0.646 | 0.353 | 2.834  | 16 |
|     | RStr to LIPL      | 0.259        | 0.237         | 0.699        | 1.432        | 13        | 0.213  | 0.27  | 0.586 | 1.705  | 16 |
|     |                   | 0.272        | 0.263         | 0.694        | 1.442        | 11        | 0.117  | 0.576 | 0.395 | 2.534  | 14 |
|     | RStr to RIPL      | 0.204        | 0.35          | 0.538        | 1.859        | 13        | 0.177  | 0.358 | 0.486 | 2.058  | 16 |

|     |              |               |              |              |              |           |               |              |              |              |           |
|-----|--------------|---------------|--------------|--------------|--------------|-----------|---------------|--------------|--------------|--------------|-----------|
| AFM | RStr to LTh  | -0.041        | 0.852        | 0.355        | 2.816        | 13        | -0.213        | 0.27         | 0.586        | 1.705        | 16        |
|     |              | <i>-0.242</i> | <i>0.355</i> | <i>0.598</i> | <i>1.671</i> | <i>10</i> | <i>-0.357</i> | <i>0.104</i> | <i>1.301</i> | <i>0.768</i> | <i>13</i> |
|     | RStr to RTh  | 0.204         | 0.35         | 0.538        | 1.859        | 13        | 0.089         | 0.646        | 0.353        | 2.834        | 16        |
|     |              |               |              |              |              |           | <i>0.04</i>   | <i>0.84</i>  | <i>0.333</i> | <i>2.999</i> | <i>15</i> |
|     | RStr to LStr | 0.314         | 0.152        | 0.964        | 1.037        | 13        | 0.355         | 0.066        | 1.743        | 0.574        | 16        |
|     |              | <i>0.229</i>  | <i>0.342</i> | <i>0.58</i>  | <i>1.726</i> | <i>11</i> | <i>0.38</i>   | <i>0.067</i> | <i>1.742</i> | <i>0.574</i> | <i>14</i> |
|     | RStr to RStr | 0.259         | 0.237        | 0.699        | 1.432        | 13        | 0.124         | 0.52         | 0.391        | 2.558        | 16        |
|     |              | <i>0.304</i>  | <i>0.184</i> | <i>0.855</i> | <i>1.169</i> | <i>12</i> | <i>0.081</i>  | <i>0.687</i> | <i>0.354</i> | <i>2.822</i> | <i>15</i> |

\*  $p < 0.05$ , JSZ-BF10 > 3, JSZ-BF01 > 3; Italics represent results after removing outliers for each comparison. We highlight in bold the comparisons that indicated a significant correlation prior to removal of outliers, and in grey those that provided evidence for a lack of a correlation after removing outliers.

PCC, posterior cingulate cortex / precuneus; MPFC, medial prefrontal cortex; LIPL, left inferior parietal lobule; RIPL, right inferior parietal lobule; LTh, left thalamus; RTh, right thalamus; LStr, left striatum; RStr, right striatum.
